# Supplementary figures and images for: A chiral iron-sexipyridine complex as a catalyst for alkene epoxidation with hydrogen peroxide
Source: Royal Society of Chemistry journal article supplement (doi:10.1039/b804281k), 2008-01-01

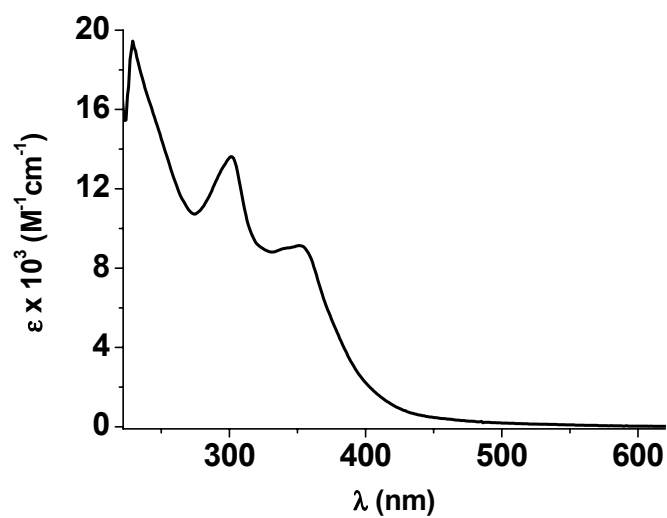

**ESI S1** UV-vis spectrum of  $[Fe_2O(L)Cl_4]$  at rt in  $CH_2Cl_2$  solutions.

Supplement: b804281k.pdf [file b804281k.pdf]
